# Supplementary material for: Pf4 Phage Variant Infection Reduces Virulence-Associated Traits in Pseudomonas aeruginosa
Source: PubMed Central journal article supplement (PMC9602442; doi:10.1128/spectrum.01548-22), 2022-08-29
Supplement: spectrum.01548-22-s0001.pdf [file spectrum.01548-22-s0001.pdf]

# Supplemental Material

## **Pf4 phage variant infection reduces virulence-associated traits in *Pseudomonas aeruginosa***

Tortuel Damien<sup>1,2</sup>, Tahrioui Ali<sup>1,2</sup>, David Audrey<sup>1,2</sup>, Cambrone! Mélyssa<sup>1,2</sup>, Nilly Flore<sup>1,2</sup>, Clamens Thomas<sup>3</sup>, Maillot Olivier<sup>1,2</sup>, Barreau Magalie<sup>1,2</sup>, Feuilloley Marc GJ<sup>1,2</sup>, Lesouhaitier Olivier<sup>1,2</sup>, Filloux Alain<sup>3</sup>, Bouffartigues Emeline<sup>1,2</sup>, Cornelis Pierre<sup>1,2,4</sup>, Chevalier Sylvie<sup>1,2\*</sup>

<sup>1</sup>Unité de recherche Communication Bactérienne et Stratégies Anti-infectieuses, CBSA UR4312, Université de Rouen Normandie, Évreux, France.

<sup>2</sup>Normandie Université, Fédération de Recherche SésAD, Université de Rouen Normandie,

<sup>3</sup>MRC Centre for Molecular Bacteriology and Infection, Department of Life Sciences, Imperial College London, SW7 2AZ London, United Kingdom.

<sup>4</sup>Laboratorium Microbiologie, Vrije Universiteit Brussel (VUB), Belgium.

\*Corresponding Author : Pr. Sylvie Chevalier, 55 rue Saint Germain, 27000 Evreux, France. Tel: +33-235140000; Fax: +33-232291550; sylvie.chevalier@univ-rouen.fr

### **SUPPLEMENTARY FIGURES**

**Supplementary Figure S1**

**Supplementary Figure S2**

### **SUPPLEMENTARY TABLES**

**Supplementary Table S1**

**Supplementary Table S2**

**Supplementary Table S3**

### **SUPPLEMENTARY REFERENCES**

## SUPPLEMENTARY FIGURES

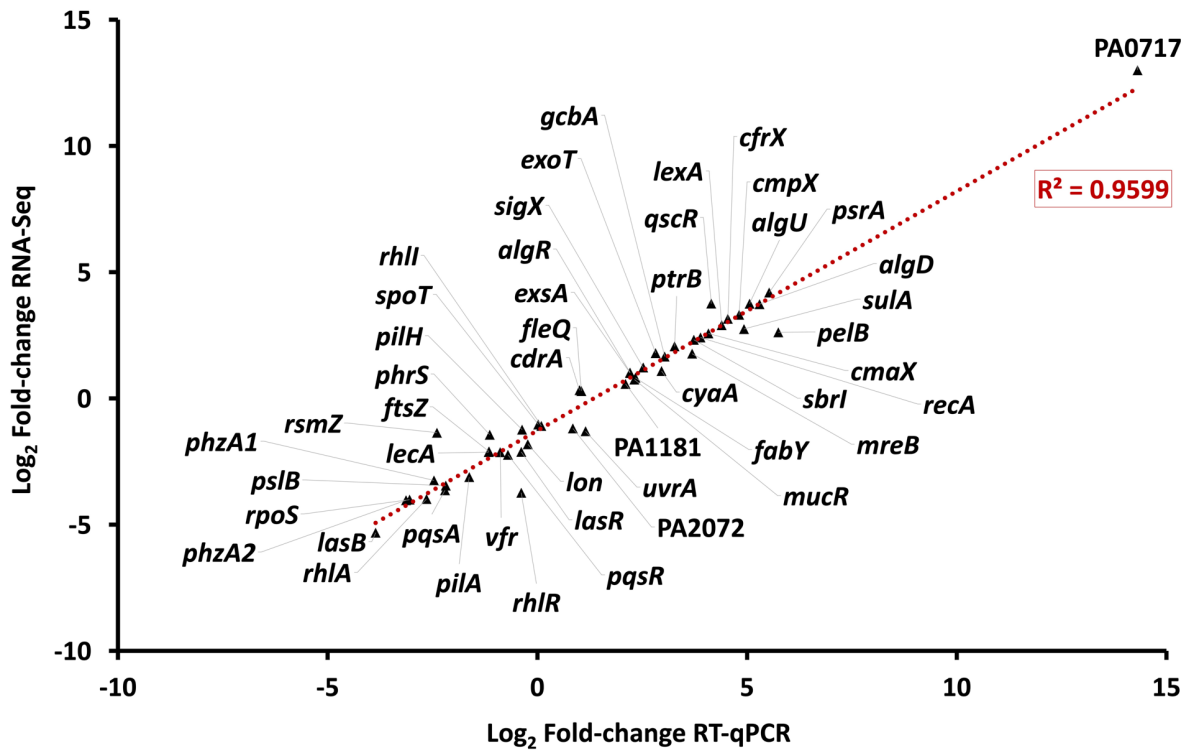

**Supplementary Figure S1.** Correlation between the log<sub>2</sub> fold change of several genes in RNA-seq and RT-qPCR data.

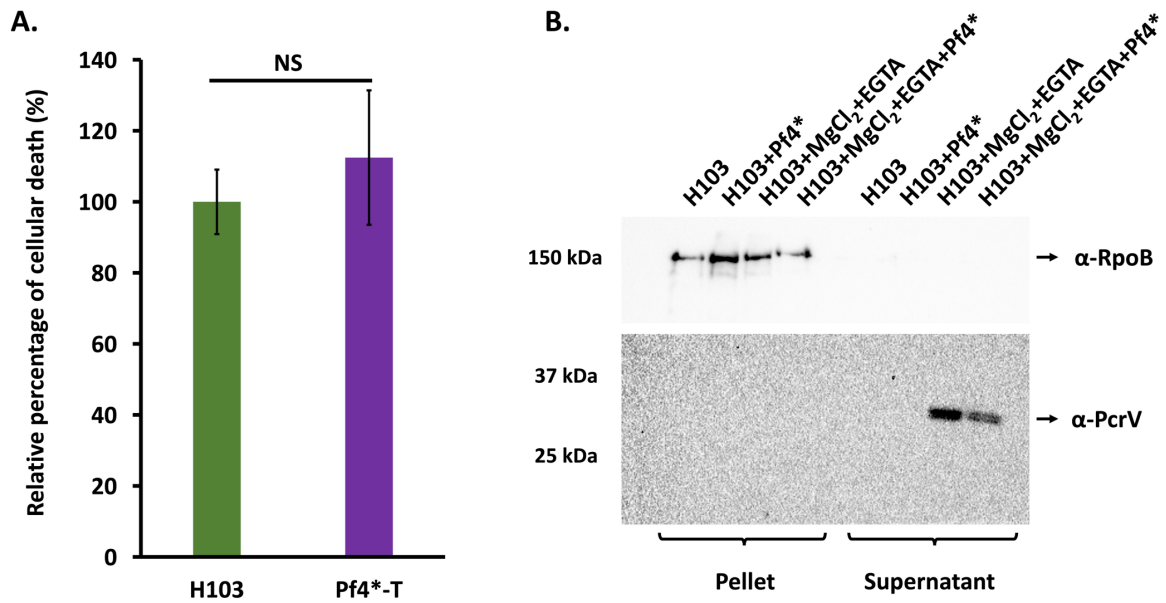

**Supplementary Figure S2.** Pf4\*-infection did not lead to T3SS activity alterations. **A.** Cytotoxicity of Pf4\*-treated or untreated *P. aeruginosa* H103 on A549 lung cells. Statistics were achieved by paired (two samples) two-tailed t-test. <sup>NS</sup> $p > 0.05$ . **B.** Functionality of the T3SS assessed by western blot analysis of pellets using  $\alpha$ -RpoB antibodies to evaluate the bacterial amount, and of cell supernatants using  $\alpha$ -PcrV antibodies to detect presence of the secreted  $\alpha$ -PcrV protein.  $\alpha$ -PcrV was detected in similar amounts in Pf4\*-treated or untreated *P. aeruginosa* H103 when treated with MgCl<sub>2</sub> and EGTA.

## SUPPLEMENTARY TABLES

**Supplementary Table S1.** List of genes under and overexpressed after Pf4 phage variant treatment compared to H103 ( $p$ -value  $\leq 0.05$  and fold-change  $\leq -2$  or  $\geq 2$ ), classified by functions, PA number, related to iron, QS or virulence factors.

























































# Related to iron

| PA number               | Gene name    | Product name                                                   | Fold-change | Regulators                                    |
|-------------------------|--------------|----------------------------------------------------------------|-------------|-----------------------------------------------|
| <b>Pyoverdine</b>       |              |                                                                |             |                                               |
| PA2427                  | <i>pvdY</i>  | Pyoverdine biosynthesis protein                                | -6,13       |                                               |
| PA2426                  | <i>pvdS</i>  | sigma factor PvdS                                              | -33,33      | PvdS/Fur/OxyR/PA2206/AlgR/PirR/CysB/CzcR/AmgR |
| PA2425                  | <i>pvdG</i>  | Pyoverdine biosynthesis protein                                | -6,66       | PvdS                                          |
| PA2424                  | <i>pvdL</i>  | Non ribosomal peptide synthetase (NRPS)                        | -6,53       | PvdS                                          |
| PA2413                  | <i>pvdH</i>  | L-2,4-diaminobutyrate:2-ketoglutarate 4-aminotransferase, PvdH | -3,84       |                                               |
| PA2412                  | <i>mbtH</i>  | NRPS assist                                                    | -5,26       |                                               |
| PA2411                  |              | probable thioesterase                                          | -5,10       |                                               |
| PA2410                  | <i>fpvF</i>  | Fe-pyoverdine utilisation in periplasm                         | -4,65       |                                               |
| PA2409                  | <i>fpvE</i>  | Fe-pyoverdine utilisation in periplasm                         | -5,98       |                                               |
| PA2408                  | <i>fpvD</i>  | Fe-pyoverdine utilisation in periplasm                         | -5,46       |                                               |
| PA2407                  | <i>fpvC</i>  | Fe-pyoverdine utilisation in periplasm                         | -5,71       |                                               |
| PA2406                  | <i>fpvK</i>  | Fe-pyoverdine utilisation in periplasm                         | -5,12       |                                               |
| PA2405                  | <i>fpvJ</i>  | Fe-pyoverdine utilisation in periplasm                         | -5,52       |                                               |
| PA2404                  | <i>fpvH</i>  | Fe-pyoverdine utilisation in periplasm                         | -4,95       |                                               |
| PA2403                  | <i>fpvG</i>  | Fe-pyoverdine utilisation in periplasm                         | -2,89       | PvdS/SigX/FpvI                                |
| PA2402                  | <i>pvdI</i>  | probable non-ribosomal peptide synthetase (NRPS)               | -2,07       | PvdS/SigX/FpvI                                |
| PA2401                  | <i>pvdJ</i>  | NRPS                                                           | Unchanged   |                                               |
| PA2399                  | <i>pvdD</i>  | NRPS                                                           | Unchanged   |                                               |
| PA2398                  | <i>fpvA</i>  | ferripyoverdine transporter                                    | -8,13       | FpvI/SigX                                     |
| PA2397                  | <i>pvdE</i>  | pyoverdine biosynthesis protein PvdE                           | -13,51      | PvdS                                          |
| PA2396                  | <i>pvdF</i>  | pyoverdine synthetase F                                        | -5,46       | PvdS                                          |
| PA2395                  | <i>pvdO</i>  | Pyoverdine chromophore maturation                              | -8,47       | PvdS                                          |
| PA2394                  | <i>pvdN</i>  | Pyoverdine chromophore maturation                              | -14,49      | PvdS                                          |
| PA2393                  | <i>pvdM</i>  | putative dipeptidase                                           | -12,34      | PvdS                                          |
| PA2392                  | <i>pvdP</i>  | Pyoverdine chromophore maturation                              | -3,25       | PvdS                                          |
| PA2391                  | <i>opmQ</i>  | RND efflux OMP/recycling of apopyoverdine                      | -8,69       |                                               |
| PA2390                  | <i>pvdT</i>  | RND efflux/recycling of apopyoverdine                          | -4,60       |                                               |
| PA2389                  | <i>pvdR</i>  | RND efflux/recycling of apopyoverdine                          | -2,36       |                                               |
| PA2388                  | <i>fpvR</i>  | Anti-sigma factor                                              | Unchanged   | Fur/FpvI/SigX                                 |
| PA2387                  | <i>fpvI</i>  | ECF sigma                                                      | Unchanged   | Fur/FpvI                                      |
| PA2386                  | <i>pvdA</i>  | L-ornithine N5-oxygenase                                       | -13,15      | PvdS/FpvI                                     |
| PA2385                  | <i>pvdQ</i>  | Acylase                                                        | -8,47       |                                               |
| PA2384                  |              | Fur-like regulator                                             | -4,13       |                                               |
| <b>Pyochelin</b>        |              |                                                                |             |                                               |
| PA4231                  | <i>pchA</i>  | salicylate biosynthesis isochorismate synthase                 | -10,52      | PchR                                          |
| PA4230                  | <i>pchB</i>  | salicylate biosynthesis protein PchB                           | -12,50      | PchR                                          |
| PA4229                  | <i>pchC</i>  | pyochelin biosynthetic protein PchC                            | -11,76      | PchR                                          |
| PA4228                  | <i>pchD</i>  | pyochelin biosynthesis protein PchD                            | -10,20      | PchR                                          |
| PA4227                  | <i>pchR</i>  | transcriptional regulator PchR                                 | -4,18       | Fur/PchR                                      |
| PA4226                  | <i>pchE</i>  | dihydroaeruginic acid synthetase                               | -5,71       | Fur/PchR                                      |
| PA4225                  | <i>pchF</i>  | pyochelin synthetase                                           | -4,06       | Fur/PchR                                      |
| PA4224                  | <i>pchG</i>  | pyochelin biosynthetic protein PchG                            | -3,27       | Fur/PchR                                      |
| PA4223                  | <i>pchH</i>  | probable ATP-binding component of ABC transporter              | -2,43       | Fur/PchR                                      |
| PA4222                  | <i>pchI</i>  |                                                                | Unchanged   | Fur/PchR                                      |
| PA4221                  | <i>jptA</i>  | Fe(III)-pyochelin outer membrane receptor precursor            | -6,49       | Fur/PchR                                      |
| PA4220                  | <i>jptB</i>  | hypothetical protein                                           | -6,99       | Fur/PchR                                      |
| <b>Xenosiderophores</b> |              |                                                                |             |                                               |
| PA0149                  |              | ECF sigma                                                      | Unchanged   | Fur                                           |
| PA0151                  |              | TonB dependent transporter                                     | 4,12        |                                               |
| PA0192                  |              | TonB dependent transporter                                     | 6,90        |                                               |
| PA0434                  |              | TonB dependent transporter                                     | -2,23       |                                               |
| PA0470                  | <i>fiuA</i>  | TonB dependent transporter for ferrichrome                     | -3,59       |                                               |
| PA0471                  | <i>fiuR</i>  | Anti-sigma                                                     | -9,34       |                                               |
| PA0472                  | <i>fiuI</i>  | ECF sigma                                                      | -8,69       | Fur                                           |
| PA0931                  | <i>pirA</i>  | ferric enterobactin receptor PirA                              | -2,92       | Fur/PirR                                      |
| PA1322                  | <i>pfuA</i>  | TonB dependent transporter                                     | Unchanged   | Fur                                           |
| PA1363                  |              | ECF sigma factor                                               | -3,24       | Fur                                           |
| PA1365                  | <i>aleB</i>  | TonB dependent transporter                                     | -2,85       | Fur                                           |
| PA1910                  | <i>femA</i>  | TonB dependent mycobactin transporter                          | Unchanged   | Fur                                           |
| PA2050                  |              | ECF sigma                                                      | 9,11        | Fur                                           |
| PA2057                  | <i>sppR</i>  | TonB dependent transporter                                     | 7,31        | PA2050                                        |
| PA2058                  | <i>sppA</i>  | ABC transporter substrate-binding protein, SppA                | 13,08       | PA2050                                        |
| PA2059                  | <i>sppB</i>  | ABC transporter permease, SppB                                 | 23,43       | PA2050                                        |
| PA2060                  | <i>sppC</i>  | ABC transporter permease, SppC                                 | 8,45        | PA2050                                        |
| PA2061                  | <i>sppD</i>  | ABC transporter ATP-binding protein, SppD                      | 3,11        | PA2050                                        |
| PA2289                  |              | TonB dependent transporter                                     | -6,41       | Fur                                           |
| PA2466                  | <i>foxA</i>  | TonB ferrioxamine dependent transporter                        | -3,06       | Fur                                           |
| PA2467                  | <i>foxR</i>  | Anti-sigma factor FoxR                                         | -3,80       |                                               |
| PA2468                  | <i>foxI</i>  | ECF sigma factor FoxI                                          | -4,34       | Fur                                           |
| PA2686                  | <i>pfeR</i>  | two-component response regulator PfeR                          | -3,30       | PfeR                                          |
| PA2687                  | <i>pfeS</i>  | Anti sigma                                                     | Unchanged   | Fur                                           |
| PA2688                  | <i>pfeA</i>  | TonB dependent enterobactin transporter                        | Unchanged   | Fur                                           |
| PA3531                  | <i>bfrB</i>  | Bacterioferritin                                               | 10,20       | PrrF                                          |
| PA3899                  | <i>fecl</i>  | ECF sigma                                                      | -2,25       | Fur                                           |
| PA3900                  | <i>fecR</i>  | FecR                                                           | -3,84       | Fur                                           |
| PA3901                  | <i>fecA</i>  | Fe(III) dicitrate tTonB-dependent transport protein FecA       | -2,60       | Fur                                           |
| PA4168                  | <i>fpvB</i>  | second ferric pyoverdine transporter FpvB                      | -4,06       | Fur                                           |
| PA4514                  | <i>piuA</i>  | TonB-dependent transporter                                     | -3,17       | Fur                                           |
| PA4515                  | <i>piuC</i>  | conserved hypothetical protein                                 | -4,31       | Fur                                           |
| PA4675                  | <i>chtA</i>  | TonB-dependent aerobactin transporter                          | -5,43       | Fur                                           |
| PA4704,2                | <i>prfF2</i> | sRNA                                                           | -7,70       | Fur                                           |
| PA4896                  |              | ECF sigma                                                      | Unchanged   | Fur                                           |
| PA4897                  | <i>optI</i>  | TonB dependent transporter                                     | Unchanged   | Fur                                           |
| <b>Heme uptake</b>      |              |                                                                |             |                                               |
| PA1300                  | <i>hxuI</i>  | ECF sigma factor                                               | 4,41        | Fur                                           |
| PA1301                  | <i>hxuR</i>  | probable transmembrane sensor                                  | 4,55        | Fur                                           |
| PA1302                  | <i>hxuA</i>  | TonB-dependent transporter                                     | 5,94        | Fur                                           |
| PA3407                  | <i>hasAp</i> | heme acquisition protein HasAp                                 | -5,31       | HasAp/HasR                                    |
| PA3408                  | <i>hasR</i>  | TonB-dependent transporter                                     | Unchanged   | Fur                                           |
| PA4708                  | <i>phuT</i>  | Heme-transport protein, PhuT                                   | -2,10       |                                               |
| PA4710                  | <i>phuR</i>  | TonB-dependent transporter                                     | -10,52      | Fur                                           |

# Related to QS

| PA number | Gene name    | Product name                                                      | Fold-change | Schuster 2003 | Asfahl & Schuster 2018 | Gilbert 2009 | Groleau 2020 | Bredenbruch 2006 |
|-----------|--------------|-------------------------------------------------------------------|-------------|---------------|------------------------|--------------|--------------|------------------|
| PA0007    |              | cytochrome c                                                      | -2.2        | LasR/RhlR     |                        |              |              |                  |
| PA0026    | <i>picB</i>  | phospholipase C, PicB                                             | -6          | LasR/RhlR     | LasR/RhlR              | LasR         |              |                  |
| PA0027    |              | hypothetical protein                                              | -7.5        | LasR/RhlR     | LasR/RhlR              |              |              |                  |
| PA0028    |              |                                                                   | -5.7        | LasR/RhlR     |                        |              |              |                  |
| PA0051    | <i>phzH</i>  | potential phenazine-modifying enzyme                              | -8.4        | LasR/RhlR     |                        |              |              |                  |
| PA0052    |              | hypothetical protein                                              | -8.8        | LasR/RhlR     | LasR/RhlR              |              |              |                  |
| PA0059    | <i>osmC</i>  | Osmotically induced protein                                       | -2.6        | LasR/RhlR     |                        |              |              |                  |
| PA0109    |              |                                                                   | -2.4        | LasR/RhlR     |                        |              |              |                  |
| PA0122    | <i>roh</i>   | Hemolysin                                                         | -10.3       | LasR/RhlR     |                        | LasR         |              |                  |
| PA0143    | <i>nuh</i>   | purine nucleosidase Nuh                                           | -5.9        | LasR/RhlR     | LasR/RhlR              | LasR         |              |                  |
| PA0178    |              | probable two-component sensor                                     | -10.3       |               |                        |              |              |                  |
| PA0200    |              |                                                                   | -3.8        |               |                        |              |              |                  |
| PA0214    | <i>norB</i>  | nitric oxide reductase subunit B                                  | -3.5        |               |                        | LasR/RhlR    |              | MvR              |
| PA0572    | <i>impA</i>  | hypothetical protein                                              | -3.7        | LasR/RhlR     |                        |              |              |                  |
| PA0996    | <i>pqsA</i>  | HQI biosynthesis                                                  | -12.5       | LasR/RhlR     |                        | LasR         |              |                  |
| PA0997    | <i>pqsB</i>  | HQI biosynthesis                                                  | -11.1       | LasR/RhlR     |                        |              |              |                  |
| PA0998    | <i>pqsC</i>  | HQI biosynthesis                                                  | -15.7       | LasR/RhlR     |                        |              |              |                  |
| PA0999    | <i>pqsD</i>  | HQI biosynthesis                                                  | -13.3       | LasR/RhlR     |                        |              |              |                  |
| PA1000    | <i>pqsE</i>  | Quinolone signal response protein                                 | -7.7        | LasR/RhlR     |                        |              |              |                  |
| PA1001    | <i>phnA</i>  | Anthranilate kinase                                               | -6.4        | LasR/RhlR     |                        |              |              |                  |
| PA1002    | <i>phnB</i>  | Anthranilate kinase                                               | -9.2        | LasR/RhlR     |                        |              |              |                  |
| PA1003    | <i>myrR</i>  | PCS regulator                                                     | -4.7        | LasR/RhlR     |                        | LasR         |              |                  |
| PA1110    | <i>rhmC</i>  | rhamnosyltransferase 2                                            | -10.8       |               |                        |              |              |                  |
| PA1174    | <i>nopA</i>  | Periplasmic nitrate reductase                                     | -7.1        | LasR/RhlR     |                        |              |              | MvR              |
| PA1215    |              | AMP binding                                                       | -30         | LasR/RhlR     |                        |              |              |                  |
| PA1216    |              | SAM methyl transferase                                            | -43.6       | LasR/RhlR     |                        |              |              |                  |
| PA1217    |              | isopropylmalate synthase                                          | -15.7       | LasR/RhlR     |                        |              |              |                  |
| PA1218    |              | Phytoanyl CoA dioxygenase                                         | -34.4       | LasR/RhlR     |                        |              |              |                  |
| PA1245    | <i>aprX</i>  | TSS                                                               | -3.9        | LasR/RhlR     |                        | LasR         |              | MvR              |
| PA1246    | <i>aprD</i>  | alkaline protease secretion protein AprD                          | -4.1        | LasR/RhlR     | LasR/RhlR              |              |              |                  |
| PA1248    | <i>aprF</i>  | Alkaline protease secretion outer membrane protein AprF precursor | -10.5       | LasR/RhlR     | LasR/RhlR              |              |              | MvR              |
| PA1249    | <i>aprA</i>  | alkaline metalloprotease precursor                                | -19.6       | LasR/RhlR     | LasR/RhlR              |              |              | MvR              |
| PA1250    | <i>aprI</i>  | alkaline protease inhibitor AprI                                  | -4.1        | LasR/RhlR     | LasR/RhlR              |              |              |                  |
| PA1430    | <i>lasR</i>  | transcriptional regulator LasR                                    | -4.3        |               |                        |              |              |                  |
| PA1431    | <i>rsn1</i>  | regulatory protein Rsn1                                           | -5          | LasR/MvR      | LasR/RhlR              | LasR         |              |                  |
| PA1663    | <i>slg2</i>  | Slg2                                                              | -3.2        | LasR/RhlR     | LasR/RhlR              |              |              |                  |
| PA1664    | <i>orjX</i>  |                                                                   | -3.2        | LasR/RhlR     |                        |              |              |                  |
| PA1665    | <i>fla2</i>  |                                                                   | -5.2        | LasR/RhlR     |                        |              |              |                  |
| PA1666    | <i>flg2</i>  |                                                                   | -5          | LasR/RhlR     |                        |              |              |                  |
| PA1667    | <i>hcaJ2</i> |                                                                   | -1.8        | LasR/RhlR     |                        |              |              |                  |
| PA1668    | <i>dotU2</i> | DotU2                                                             | -2.6        | LasR/RhlR     | LasR/RhlR              |              |              |                  |
| PA1784    |              | hypothetical protein                                              | -10.8       | LasR/RhlR     |                        |              |              |                  |
| PA1869    | <i>acpI</i>  | acyl carrier protein                                              | -6.4        | LasR/RhlR     |                        |              |              |                  |
| PA1871    | <i>lasA</i>  | LasA protease precursor                                           | -42.4       | LasR/RhlR     | LasR/RhlR              |              |              |                  |
| PA1893    |              | hypothetical protein                                              | -12.2       | LasR/RhlR     | LasR/RhlR              |              |              |                  |
| PA1894    |              | hypothetical protein                                              | -15.0       | LasR/RhlR     | LasR/RhlR              |              |              |                  |
| PA1895    |              | hypothetical protein                                              | -16.1       | LasR/RhlR     | LasR/RhlR              |              |              |                  |
| PA1896    |              | hypothetical protein                                              | -11.6       | LasR/RhlR     | LasR/RhlR              |              |              |                  |
| PA1897    |              | hypothetical protein                                              | -10.5       | LasR/RhlR     | LasR/RhlR              |              |              |                  |
| PA1899    | <i>phzA2</i> | probable phenazine biosynthesis protein                           | -16.4       |               |                        |              | RhlR/MvR     |                  |
| PA1900    | <i>phzB2</i> | probable phenazine biosynthesis protein                           | -3.7        |               |                        |              | RhlR/MvR     |                  |
| PA1901    | <i>phzC2</i> | phenazine biosynthesis protein PhzC                               | -16.4       |               |                        |              | RhlR/MvR     |                  |
| PA1902    | <i>phzD2</i> | phenazine biosynthesis protein PhzD                               | -17.2       |               |                        |              | RhlR/MvR     |                  |
| PA1903    | <i>phzE2</i> | phenazine biosynthesis protein PhzE                               | -19.2       |               |                        |              | RhlR/MvR     |                  |
| PA1904    | <i>phzF2</i> | probable phenazine biosynthesis protein                           | -23.3       |               |                        |              | RhlR/MvR     |                  |
| PA1905    | <i>phzG2</i> | probable pyridoxamine 5'-phosphatase                              | -25.6       |               |                        |              | RhlR/MvR     |                  |
| PA1914    | <i>hvn</i>   | Secreted NADase                                                   | -33.3       | LasR/RhlR     |                        | LasR         |              |                  |
| PA2030    |              | hypothetical protein                                              | -10.6       | LasR/RhlR     |                        |              |              |                  |
| PA2031    |              | hypothetical protein                                              | -8.4        | LasR/RhlR     |                        |              |              |                  |
| PA2066    |              | bosman fold                                                       | -7.2        | LasR/RhlR     |                        |              |              |                  |
| PA2067    |              | Hydrolase                                                         | -16.7       | LasR/RhlR     |                        |              |              |                  |
| PA2068    |              | MFS transporter                                                   | -33.3       | LasR/RhlR     |                        |              |              |                  |
| PA2069    |              | Carbamoyl transferase                                             | -18.4       | LasR/RhlR     |                        |              |              |                  |
| PA2080    | <i>kynU</i>  | kyureninase KynU                                                  | -5.4        | LasR/RhlR     | LasR/RhlR              | LasR         |              |                  |
| PA2193    | <i>hcnA</i>  | hydrogen cyanide synthase HcnA                                    | -8.3        | LasR/RhlR     | LasR/RhlR              |              |              |                  |
| PA2194    | <i>hcnB</i>  | hydrogen cyanide synthase HcnB                                    | -9.3        | LasR/RhlR     | LasR/RhlR              |              |              |                  |
| PA2195    | <i>hcnC</i>  | hydrogen cyanide synthase HcnC                                    | -12.2       | LasR/RhlR     | LasR/RhlR              |              |              |                  |
| PA2300    | <i>chcC</i>  | Chitinase                                                         | -18.8       | LasR/RhlR     | LasR/RhlR              |              |              |                  |
| PA2301    |              | hypothetical protein                                              | -10.4       | LasR/RhlR     | LasR/RhlR              |              |              |                  |
| PA2302    | <i>ambE</i>  | AmbE                                                              | -14.5       | LasR/RhlR     | LasR/RhlR              |              |              |                  |
| PA2303    | <i>ambD</i>  | AmbD                                                              | -16.1       | LasR/RhlR     | LasR/RhlR              |              |              |                  |
| PA2304    | <i>ambC</i>  | AmbC                                                              | -13.2       | LasR/RhlR     | LasR/RhlR              |              |              |                  |
| PA2305    | <i>ambB</i>  | AmbB                                                              | -3.9        | LasR/RhlR     | LasR/RhlR              | LasR         |              |                  |
| PA2327    |              | Permease of ABC                                                   | -3          | LasR/RhlR     |                        |              |              |                  |
| PA2328    |              | TAT signal                                                        | -13.1       | LasR/RhlR     |                        |              |              |                  |
| PA2329    |              | ATP of ABC                                                        | -9.9        | LasR/RhlR     |                        |              |              |                  |
| PA2330    |              | Acyl CoA dehydrogenase                                            | -10.4       | LasR/RhlR     |                        |              |              |                  |
| PA2331    |              | Peroxydioxin                                                      | -10.8       | LasR/RhlR     |                        |              |              |                  |
| PA2384    |              | Fur like regulator                                                | -4.1        |               |                        |              |              | MvR              |
| PA2386    | <i>pvdA</i>  | Pyoverdine biosynthesis                                           | -13.1       |               |                        |              |              | MvR              |
| PA2402    | <i>pvdI</i>  | Pyoverdine biosynthesis                                           | -2          |               |                        |              |              | MvR              |
| PA2405    | <i>pvdJ</i>  | Pyoverdine utilization                                            | -5.5        |               |                        |              |              | MvR              |
| PA2412    | <i>matH</i>  | pyoverdine biosynthesis                                           | -5.3        |               |                        |              |              | MvR              |
| PA2423    |              | hypothetical protein                                              | -4.5        | LasR/RhlR     | LasR/RhlR              |              |              |                  |
| PA2427    |              | hypothetical protein                                              | -6.1        |               |                        |              |              |                  |
| PA2510    | <i>lccA</i>  | LccA lectin                                                       | -4.3        | LasR/RhlR     |                        | LasR         |              | MvR              |
| PA2587    | <i>pqsH</i>  | probable FAD-dependent monoxygenase                               | -7          | LasR/RhlR     | LasR/RhlR              | LasR         |              |                  |
| PA2588    | <i>cdpR</i>  | Transcriptional regulator                                         | -8.3        | LasR/RhlR     | LasR/RhlR              | LasR         |              |                  |
| PA2592    |              | probable periplasmic spermidine/putrescine-binding protein        | -3.3        | LasR/RhlR     |                        | LasR         |              |                  |
| PA2607    |              | conserved hypothetical protein                                    | -8.6        | LasR/RhlR     |                        |              |              |                  |
| PA2608    |              | conserved hypothetical protein                                    | -11.4       | LasR/RhlR     |                        |              |              |                  |
| PA2939    | <i>paqP</i>  | probable aminopeptidase                                           | -10.8       | LasR/RhlR     | LasR/RhlR              |              |              |                  |
| PA2949    |              | esterase                                                          | -3.1        | LasR/RhlR     | LasR/RhlR              |              |              |                  |
| PA3095    | <i>xcpZ</i>  | general secretion pathway protein M                               | -3.2        |               |                        |              | RhlR         |                  |
| PA3096    | <i>xcpP</i>  | general secretion pathway protein L                               | -3.1        |               |                        |              | RhlR         |                  |
| PA3097    | <i>xcpA</i>  | general secretion pathway protein K                               | -2          |               |                        |              | RhlR         |                  |
| PA3098    | <i>xcpW</i>  | general secretion pathway protein J                               | -5.3        |               |                        |              | RhlR         |                  |
| PA3099    | <i>xcpV</i>  | general secretion pathway protein I                               | -9.2        |               |                        |              | RhlR         |                  |
| PA3100    | <i>xcpU</i>  | General secretion pathway outer membrane protein H precursor      | -15.8       |               |                        |              | RhlR         |                  |
| PA3101    | <i>xcpT</i>  | general secretion pathway protein G                               | -17.2       |               |                        |              | RhlR         |                  |
| PA3102    | <i>xcpS</i>  | general secretion pathway protein F                               | -3.5        |               |                        |              | RhlR         |                  |
| PA3103    | <i>xcpR</i>  | general secretion pathway protein E                               | -3.8        |               |                        |              | RhlR         |                  |
| PA3105    | <i>xcpQ</i>  | general secretion pathway protein D                               | -2.5        | LasR/RhlR     |                        | LasR/RhlR    |              |                  |
| PA3305.1  | <i>phzS</i>  | PhzS                                                              | -2.7        |               |                        |              |              | MvR              |
| PA3326    | <i>clpP2</i> | ClpP2                                                             | -5.8        | LasR/RhlR     | LasR/RhlR              | LasR         |              |                  |
| PA3327    |              | probable non-ribosomal peptide synthetase                         | -4          | LasR/RhlR     | LasR/RhlR              |              |              |                  |
| PA3328    |              | probable FAD-dependent monoxygenase                               | -3.5        | LasR/RhlR     | LasR/RhlR              |              |              |                  |
| PA3329    |              | hypothetical protein                                              | -6          | LasR/RhlR     | LasR/RhlR              |              |              |                  |
| PA3330    |              | probable short chain dehydrogenase                                | -8.8        | LasR/RhlR     | LasR/RhlR              |              |              |                  |
| PA3331    |              | cytochrome P450                                                   | -9.5        | LasR/RhlR     | LasR/RhlR              |              |              |                  |
| PA3332    |              | conserved hypothetical protein                                    | -9.9        | LasR/RhlR     | LasR/RhlR              |              |              |                  |
| PA3333    | <i>fbzH2</i> | 3-oxoacyl-(acyl-carrier-protein) synthase III                     | -8.4        | LasR/RhlR     | LasR/RhlR              |              |              |                  |
| PA3336    |              | probable major facilitator superfamily (MFS) transporter          | -1.5        | LasR/RhlR     | LasR/RhlR              |              |              |                  |
| PA3361    | <i>lccB</i>  | fucose-binding lectin PA-IL                                       | -10.5       | LasR/RhlR     |                        |              | RhlR         |                  |
| PA3476    | <i>rhlI</i>  | autoinducer synthase protein RhlI                                 | -2.1        | LasR/RhlR     | LasR/RhlR              |              |              |                  |
| PA3477    | <i>rhlR</i>  | transcriptional regulator RhlR                                    | -3.3        | LasR/RhlR     | LasR/RhlR              | LasR         |              |                  |
| PA3478    | <i>rhlB</i>  | rhamnosyltransferase chain B                                      | -2.2        | LasR/RhlR     | LasR/RhlR              |              |              |                  |
| PA3479    | <i>rhlA</i>  | rhamnosyltransferase chain A                                      | -15.8       | LasR/RhlR     | LasR/RhlR              |              |              |                  |
| PA3520    |              | Periplasmic binding protein                                       | -5.3        | LasR/RhlR     |                        | LasR         |              | MvR              |
| PA3535    | <i>epsS</i>  | probable serine protease                                          | -5.3        | LasR/RhlR     | LasR/RhlR              | LasR         |              |                  |
| PA3615    |              | hypothetical protein                                              | -7.7        | LasR/RhlR     | LasR/RhlR              |              |              |                  |
| PA3724    | <i>lasB</i>  | elastase LasB                                                     | -40         | LasR/RhlR     | LasR/RhlR              | LasR         |              |                  |
| PA4078    | <i>ncsA</i>  | NCS                                                               | -19.2       | LasR/RhlR     | LasR/RhlR              |              |              |                  |
| PA4117    | <i>bphP</i>  | bacterial phytochrome, BphP                                       | -5          | LasR/RhlR     | LasR/RhlR              | LasR         |              |                  |
| PA4141    |              |                                                                   | -12.7       |               |                        |              |              |                  |
| PA4150    | <i>pqsL</i>  | probable FAD-dependent monoxygenase                               | -6.5        | LasR/RhlR     | LasR/RhlR              |              |              | MvR              |
| PA4206    | <i>mexH</i>  | RND efflux                                                        | -2.1        | LasR/RhlR     | LasR/RhlR              |              |              | MvR              |
| PA4207    | <i>mexI</i>  | RND efflux                                                        | -4.4        | LasR/RhlR     | LasR/RhlR              |              |              |                  |
| PA4208    | <i>ompD</i>  | OMP                                                               | -20.3       | LasR/RhlR     | LasR/RhlR              |              |              |                  |
| PA4209    | <i>phzM</i>  | probable phenazine-specific methyltransferase                     | -2.4        | LasR/RhlR     |                        |              | RhlR         |                  |
| PA4210    | <i>phzA1</i> | probable phenazine biosynthesis protein                           | -9.5        | LasR/RhlR     | LasR/RhlR              |              |              |                  |
| PA4211    | <i>phzI1</i> | probable phenazine biosynthesis protein                           | -6.4        | LasR/RhlR     | LasR/RhlR              |              |              | RhlR             |
| PA4212    | <i>phzC1</i> | phenazine biosynthesis protein PhzC                               | -13.1       | LasR/RhlR     | LasR/RhlR              |              |              | RhlR             |
| PA4213    | <i>phzD1</i> | phenazine biosynthesis protein PhzD                               | -19.6       | LasR/RhlR     | LasR/RhlR              |              |              | RhlR             |
| PA4214    | <i>phzE1</i> | phenazine biosynthesis protein PhzE                               | -19.6       | LasR/RhlR     | LasR/RhlR              |              |              | RhlR             |
| PA4215    | <i>phzF1</i> | probable phenazine biosynthesis protein                           | -14.1       | LasR/RhlR     | LasR/RhlR              |              |              | RhlR             |
| PA4216    | <i>phzG1</i> | probable pyridoxamine 5'-phosphatase                              | -2.2        | LasR/RhlR     | LasR/RhlR              |              |              | RhlR             |
| PA4217    | <i>phzS</i>  | flavin-containing monoxygenase                                    | -6.6        | LasR/RhlR     | LasR/RhlR              |              |              | RhlR             |
| PA4218    | <i>ompP</i>  | FpxX protein                                                      | -4.9        |               |                        |              |              | MvR              |
| PA4220    | <i>pyoB</i>  | Pyochelin                                                         | -7          |               |                        |              |              | MvR              |
| PA4221    | <i>ftsA</i>  | Fe-PCH transporter                                                | -6.5        |               |                        |              |              | MvR              |
| PA4223    | <i>pchH</i>  | Pyochelin                                                         | -2.4        |               |                        |              |              | MvR              |
| PA4224    | <i>pchG</i>  | Pyochelin                                                         | -3.3        |               |                        |              |              | MvR              |
| PA4225    | <i>pchF</i>  | Pyochelin                                                         | -4          |               |                        |              |              | MvR              |
| PA4226    | <i>pchE</i>  | Pyochelin                                                         | -5.7        |               |                        |              |              | MvR              |
| PA4228    | <i>pchD</i>  | Pyochelin                                                         | -10.2       |               |                        |              |              | MvR              |
| PA4229    | <i>pchC</i>  | Pyochelin                                                         | -11.7       |               |                        |              |              | MvR              |
| PA4230    | <i>pchB</i>  | Pyochelin                                                         | -12.5       |               |                        |              |              | MvR              |
| PA4231    | <i>pchA</i>  | Pyochelin                                                         | -10.5       |               |                        |              |              | MvR              |
| PA4236    | <i>kdsA</i>  | Catalase                                                          | -5.6        |               |                        |              |              | MvR              |
| PA4306    | <i>flp</i>   | Type IVb pilin, Flp                                               | -12.3       | LasR/RhlR     |                        | LasR         |              |                  |
| PA4467    |              | Zn permease                                                       | -9.6        |               |                        |              |              | MvR              |
| PA4468    | <i>sodA</i>  | Superoxide dismutase Mn factored                                  | -2.7        |               |                        |              |              | MvR              |
| PA4469    |              | hypothetical protein                                              | -16.3       |               |                        |              |              | MvR              |
| PA4470    | <i>fumC1</i> | Fumarate hydratase                                                | -19.1       |               |                        |              |              | MvR              |
| PA4550    | <i>prt</i>   | protease activator                                                | -15.7       | LasR/RhlR     |                        |              |              | MvR              |
| PA4648    | <i>cupE1</i> | Pilin subunit                                                     | -28.5       | LasR/RhlR     |                        |              |              |                  |
| PA4649    | <i>cupE2</i> | Pilin subunit                                                     | -35         | LasR/RhlR     |                        |              |              |                  |
| PA4650    | <i>cupE3</i> | Pilin subunit                                                     | -17.2       | LasR/RhlR     |                        |              |              |                  |
| PA4651    | <i>cupE4</i> | Chaperone                                                         | -54.6       | LasR/RhlR     |                        |              |              |                  |
| PA4652    | <i>cupE5</i> | Usher                                                             | -9.1        | LasR/RhlR     |                        |              |              |                  |
| PA4653    | <i>cupE6</i> | Fimbrial adhesin                                                  | -26.6       | LasR/RhlR     |                        |              |              |                  |
| PA4778    | <i>cueK</i>  | CueK                                                              | -3.2        | LasR/RhlR     | LasR/RhlR              | LasR         |              |                  |
| PA4869    |              | hypothetical protein                                              | -3.4        | LasR/RhlR     | LasR/RhlR              |              |              |                  |
| PA5170    | <i>avrD</i>  | AgvD/n antiporter                                                 | -9          |               |                        |              |              | MvR              |
| PA5220    |              | hypothetical protein                                              | -10         | LasR/RhlR     |                        |              |              |                  |
| PA5255    | <i>algQ</i>  | Alginate regulatory protein AlgQ                                  | -3.9        | LasR/RhlR     | LasR/RhlR              |              |              |                  |
| PA5460    |              | hypothetical protein                                              | -8.7        |               |                        |              |              | MvR              |

# Related to virulence factors

| PA number        | Gene name         | Product name                                                      | Fold-change | Regulation |
|------------------|-------------------|-------------------------------------------------------------------|-------------|------------|
| PA0026           | <i>plcB</i>       | phospholipase C, PlcB                                             | -6          | QS         |
| PA0051           | <i>phzH</i>       | potential phenazine-modifying enzyme                              | -8,4        | QS         |
| PA0122           | <i>rahU</i>       | Hemolysin                                                         | -26,3       | QS         |
| PA0996           | <i>pqsA</i>       | HHQ biosynthesis                                                  | -12,5       | QS         |
| PA0997           | <i>pqsB</i>       | HHQ biosynthesis                                                  | -21,7       | QS         |
| PA0998           | <i>pqsC</i>       | HHQ biosynthesis                                                  | -21,7       | QS         |
| PA0999           | <i>pqsD</i>       | HHQ biosynthesis                                                  | -13,3       | QS         |
| PA1000           | <i>pqsE</i>       | Quinolone signal response protein                                 | -7,7        | QS         |
| PA1001           | <i>phnA</i>       | Anthranilate kinase                                               | -6,4        | QS         |
| PA1002           | <i>phnB</i>       | Anthranilate kinase                                               | -9,2        | QS         |
| PA1003           | <i>mvjR</i>       | PQS regulator                                                     | -4,7        | QS         |
| PA1130           | <i>rhlC</i>       | rhamnosyltransferase 2                                            | -10,8       | QS         |
| PA1248           | <i>aprF</i>       | Alkaline protease secretion outer membrane protein AprF precursor | -10,5       | QS         |
| PA1249           | <i>aprA</i>       | alkaline metalloproteinase precursor                              | -45,4       | QS         |
| PA1250           | <i>aprI</i>       | alkaline proteinase inhibitor AprI                                | -4,1        | QS         |
| PA1430           | <i>lasR</i>       | transcriptional regulator LasR                                    | -4,3        | QS         |
| PA1431           | <i>rsaL</i>       | regulatory protein RsaL                                           | -5          | QS         |
| PA1871           | <i>lasA</i>       | LasA protease precursor                                           | -62,5       | QS         |
| PA1899           | <i>phzA2</i>      | probable phenazine biosynthesis protein                           | -16,4       | QS         |
| PA1900           | <i>phzB2</i>      | probable phenazine biosynthesis protein                           | -3,7        | QS         |
| PA1901           | <i>phzC2</i>      | phenazine biosynthesis protein PhzC                               | -16,4       | QS         |
| PA1902           | <i>phzD2</i>      | phenazine biosynthesis protein PhzD                               | -17,2       | QS         |
| PA1903           | <i>phzE2</i>      | phenazine biosynthesis protein PhzE                               | -19,2       | QS         |
| PA1904           | <i>phzF2</i>      | probable phenazine biosynthesis protein                           | -21,3       | QS         |
| PA1905           | <i>phzG2</i>      | probable pyridoxamine 5'-phosphate oxidase                        | -23,8       | QS         |
| PA1914           | <i>hvn</i>        | Secreted NADase                                                   | -333,3      | QS         |
| PA2080           | <i>kynU</i>       | kynureninase KynU                                                 | -5,4        | QS         |
| PA2193           | <i>hcnA</i>       | hydrogen cyanide synthase HcnA                                    | -8,3        | QS         |
| PA2194           | <i>hcnB</i>       | hydrogen cyanide synthase HcnB                                    | -9,3        | QS         |
| PA2195           | <i>hcnC</i>       | hydrogen cyanide synthase HcnC                                    | -12,2       | QS         |
| PA2300           | <i>chiC</i>       | Chitinase                                                         | -18,8       | QS         |
| PA2302           | <i>ambE</i>       | AmbE                                                              | -14,5       | QS         |
| PA2303           | <i>ambD</i>       | AmbD                                                              | -16,1       | QS         |
| PA2304           | <i>ambC</i>       | AmbC                                                              | -11,2       | QS         |
| PA2305           | <i>ambB</i>       | AmbB                                                              | -3,9        | QS         |
| PA2386           | <i>pvdA</i>       | Pyoverdine biosynthesis                                           | -13,1       | QS         |
| PA2402           | <i>pvdI</i>       | Pyoverdine biosynthesis                                           | -2          | QS         |
| PA2405           | <i>fpvJ</i>       | Pyoverdine utilisation                                            | -5,5        | QS         |
| PA2412           | <i>mbtH</i>       | Pyoverdine biosynthesis                                           | -5,3        | QS         |
| PA2570           | <i>lecA</i>       | LecA lectin                                                       | -4,3        | QS         |
| PA2587           | <i>pqsH</i>       | probable FAD-dependent monooxygenase                              | -7          | QS         |
| PA3361           | <i>lecB</i>       | fucose-binding lectin PA-III                                      | -10,5       | QS         |
| PA3476           | <i>rhlI</i>       | autoinducer synthesis protein RhlI                                | -2,1        | QS         |
| PA3477           | <i>rhlR</i>       | transcriptional regulator RhlR                                    | -13,3       | QS         |
| PA3478           | <i>rhlB</i>       | rhamnosyltransferase chain B                                      | -22,2       | QS         |
| PA3479           | <i>rhlA</i>       | rhamnosyltransferase chain A                                      | -15,8       | QS         |
| PA3724           | <i>lasB</i>       | elastase LasB                                                     | -40         | QS         |
| PA4175           | <i>piv (prpL)</i> | Protease IV                                                       | -29,41      | QS         |
| PA4206           | <i>mexH</i>       | RND efflux                                                        | -2,1        | QS         |
| PA4207           | <i>mexI</i>       | RND efflux                                                        | -4,4        | QS         |
| PA4208           | <i>ompD</i>       | OMP                                                               | -22,7       | QS         |
| PA4209           | <i>phzM</i>       | probable phenazine-specific methyltransferase                     | -2,4        | QS         |
| PA4210           | <i>phzA1</i>      | probable phenazine biosynthesis protein                           | -9,5        | QS         |
| PA4211           | <i>phzB1</i>      | probable phenazine biosynthesis protein                           | -6,4        | QS         |
| PA4212           | <i>phzC1</i>      | phenazine biosynthesis protein PhzC                               | -13,1       | QS         |
| PA4213           | <i>phzD1</i>      | phenazine biosynthesis protein PhzD                               | -19,6       | QS         |
| PA4214           | <i>phzE1</i>      | phenazine biosynthesis protein PhzE                               | -19,6       | QS         |
| PA4215           | <i>phzF1</i>      | probable phenazine biosynthesis protein                           | -21,7       | QS         |
| PA4216           | <i>phzG1</i>      | probable pyridoxamine 5'-phosphate oxidase                        | -23,2       | QS         |
| PA4217           | <i>phzS</i>       | flavin-containing monooxygenase                                   | -6,6        | QS         |
| PA4220           | <i>fpvB</i>       | Pyochelin                                                         | -7          | QS         |
| PA4221           | <i>fpvA</i>       | Fe-PCH transporter                                                | -6,5        | QS         |
| PA4223           | <i>pchH</i>       | Pyochelin                                                         | -2,4        | QS         |
| PA4224           | <i>pchG</i>       | Pyochelin                                                         | -3,3        | QS         |
| PA4225           | <i>pchF</i>       | Pyochelin                                                         | -4          | QS         |
| PA4226           | <i>pchE</i>       | Pyochelin                                                         | -5,7        | QS         |
| PA4228           | <i>pchD</i>       | Pyochelin                                                         | -10,2       | QS         |
| PA4229           | <i>pchC</i>       | Pyochelin                                                         | -11,7       | QS         |
| PA4230           | <i>pchB</i>       | Pyochelin                                                         | -12,5       | QS         |
| PA4231           | <i>pchA</i>       | Pyochelin                                                         | -10,5       | QS         |
| <b>Secretion</b> |                   |                                                                   |             |            |
| PA1657           | <i>hsiB2</i>      | T6SS                                                              | -2,28       | QS         |
| PA1658           | <i>hsiC2</i>      | T6SS                                                              | -3,37       | QS         |
| PA1659           | <i>hsiF2</i>      | T6SS                                                              | -3,54       | QS         |
| PA1660           | <i>hsiG2</i>      | T6SS                                                              | -4,65       | QS         |
| PA1661           | <i>hsiH2</i>      | T6SS                                                              | -3,3        | QS         |
| PA1662           | <i>clpV2</i>      | T6SS                                                              | -2,99       | QS         |
| PA1663           | <i>sfa2</i>       | T6SS                                                              | -3,23       | QS         |
| PA1664           | <i>orfX</i>       | T6SS                                                              | -3,61       | QS         |
| PA1665           | <i>fla2</i>       | T6SS                                                              | -5,23       | QS         |
| PA1666           | <i>lip2</i>       | T6SS                                                              | -5          | QS         |
| PA1667           | <i>hsiJ2</i>      | T6SS                                                              | -3,84       | QS         |
| PA1668           | <i>dotU2</i>      | T6SS                                                              | -2,62       | QS         |
| PA3095           | <i>xcpZ</i>       | T2SS                                                              | -3,2        | QS         |
| PA3096           | <i>xcpY</i>       | T2SS                                                              | -3,1        | QS         |
| PA3097           | <i>xcpX</i>       | T2SS                                                              | -2          | QS         |
| PA3098           | <i>xcpW</i>       | T2SS                                                              | -5,3        | QS         |
| PA3099           | <i>xcpV</i>       | T2SS                                                              | -9,2        | QS         |
| PA3100           | <i>xcpU</i>       | T2SS                                                              | -15,8       | QS         |
| PA3101           | <i>xcpT</i>       | T2SS                                                              | -17,2       | QS         |
| PA3102           | <i>xcpS</i>       | T2SS                                                              | -3,5        | QS         |
| PA3103           | <i>xcpR</i>       | T2SS                                                              | -3,8        | QS         |
| PA3105           | <i>xcpQ</i>       | T2SS                                                              | -2,5        | QS         |
| PA2360           | <i>hsiA3</i>      | T6SS                                                              | -11,49      | QS         |
| PA2361           | <i>icmF3</i>      | T6SS                                                              | -2,61       | Iron       |
| PA2363           | <i>hsiJ3</i>      | T6SS                                                              | -3,84       | Iron       |
| PA2365           | <i>hsiB3</i>      | T6SS                                                              | -35,71      | Iron       |
| PA2366           | <i>hsiC3</i>      | T6SS                                                              | -47,61      | Iron       |
| PA2367           | <i>hcp3</i>       | T6SS                                                              | -55,55      | Iron       |
| PA2368           | <i>hsiF3</i>      | T6SS                                                              | -66,66      | Iron       |
| PA2369           | <i>hsiG3</i>      | T6SS                                                              | -32,25      | Iron       |
| PA2370           | <i>hsiH3</i>      | T6SS                                                              | -41,66      | Iron       |
| PA2371           | <i>clpV3</i>      | T6SS                                                              | -25,64      | Iron       |
| PA2372           |                   | T6SS                                                              | -17,24      | Iron       |
| PA2373           | <i>vgrG3</i>      | T6SS                                                              | -7,46       | Iron       |
| PA2374           | <i>tseF</i>       | T6SS                                                              | -7,57       | Iron       |

**Supplementary Table S2.** Strains used in this study.

| <b>Strains</b>                                                                                     | <b>Relevant characteristics</b>                                                                                                                  | <b>Sources</b>                 |
|----------------------------------------------------------------------------------------------------|--------------------------------------------------------------------------------------------------------------------------------------------------|--------------------------------|
| <b><i>Pseudomonas aeruginosa</i><br/>H103</b>                                                      | Wild-type strain; prototroph derivative of PAO1                                                                                                  | <b>Hancock and Carey, 1979</b> |
| <b><i>Pseudomonas aeruginosa</i><br/>PAO1 <math>\Delta pqsA</math> CTX-<i>lux</i>::<i>pqsA</i></b> | <i>pqsA</i> mutant containing a copy of the <i>pqsA</i> promoter fused to the CTX- <i>luxCDABE</i> cassette, Tc <sup>R</sup>                     | <b>Fletcher et al., 2007</b>   |
| <b><i>Escherichia coli</i> (pSB401)</b>                                                            | N-acyl homoserine lactones bioluminescent reporter harboring pSB401 that contains a fusion of <i>luxRI</i> ':: <i>luxCDABE</i> , Tc <sup>R</sup> | <b>Winson et al., 1998</b>     |

Tc<sup>R</sup>, Tetracycline resistance



**Supplementary Table S3.** Primers used in this study.

| PA number | Gene name    | Primer name | Sequence (5' - 3')        |
|-----------|--------------|-------------|---------------------------|
| PA0668.1  | 16SrRNA      | 16S-F       | AACCTGGGAAGTGCATCCAA      |
|           |              | 16S-R       | CTTCGCCACTGGTGTTCCTT      |
| PA0044    | <i>exoT</i>  | exoT-F      | TCGAGGCTTCCCGTACCCA       |
|           |              | exoT-R      | CAGGGCGACCTTGTCCATT       |
| PA0409    | <i>pilH</i>  | pilH-F      | GTGATCATCGTCACCACCAA      |
|           |              | pilH-R      | TTTCAGCAGGGTCTCTTCGT      |
| PA0612    | <i>ptrB</i>  | ptrB-F      | GCCAACGAACTGGTCCTG        |
|           |              | ptrB-R      | GCAGTCCTCGCAGTCTTCC       |
| PA0652    | <i>vfr</i>   | vfr-F       | CGAAACGCTGTTCTTCATCA      |
|           |              | vfr-R       | GAAATCACCGCTGTTGAGGT      |
| PA0996    | <i>pqsA</i>  | pqsA-F      | CGGAGTTGCTGGCATTGC        |
|           |              | pqsA-R      | CTGTTGCCCATGCCATAGC       |
| PA1003    | <i>pqsR</i>  | pqsR-F      | AACCTGGAAATCGACCTGTG      |
|           |              | pqsR-R      | TGAAATCGTCGAGCAGTACG      |
| PA1148    | <i>toxA</i>  | toxA-F      | ACGAGAAGCCTTCGAACATC      |
|           |              | toxA-R      | TGACGAAGAAGGTGGCATC       |
| PA1430    | <i>lasR</i>  | lasR-F      | CGTTTTCTTGAGCTGGAAC       |
|           |              | lasR-R      | GCCGAACAGGATCTTCGAG       |
| PA1713    | <i>exsA</i>  | exsA-F      | ATCGAGGAGTTGCTGATGCT      |
|           |              | exsA-R      | TCCATGAATAGCTGCAGACG      |
| PA1898    | <i>qscR</i>  | qscR-F      | AGGGGAATGGAAAAGCAGAT      |
|           |              | qscR-R      | GGGTGTATTCCAGGAGACCA      |
| PA1899    | <i>phzA2</i> | phzA2-F     | GGTTTACCGACAACCTGGAATTGC  |
|           |              | phzA2-R     | AACAGGCTGTGCCGCTGTAACC    |
| PA2523    | <i>czcR</i>  | czcR-F      | ACTTCATGGTCAAGCCGTTT      |
|           |              | czcR-R      | ACTCCTTGGTCGTCAGGTTG      |
| PA2570    | <i>lecA</i>  | lecA-F      | ATCCGGGCGATGTCATTACC      |
|           |              | lecA-R      | CAAAACGCATCGTGGCAGAT      |
| PA2896    | <i>sbri</i>  | sbri-F      | GGCAAGGTCTCTACCGTTTTT     |
|           |              | sbri-R      | AGGTTTCTGGTAGATCTCGTC     |
| PA3006    | <i>psrA</i>  | psrA-F      | CGATTCGGCGTGAACACTT       |
|           |              | psrA-R      | CGAAGAACGGCACCATCAG       |
| PA3305.1  | <i>phrS</i>  | phrS-F      | CAACTGGAGGCCATCAACAT      |
|           |              | phrS-R      | CCTTGCGTGCTCTGTGTATC      |
| PA3476    | <i>rhII</i>  | rhII-F      | GGCTGGGACTTGGCGTAG        |
|           |              | rhII-R      | GGCTGGGACTTGGCGTAG        |
| PA3477    | <i>rhIR</i>  | rhIR-F      | CTGGGCTTCGATTACTACGC      |
|           |              | rhIR-R      | CCCGTAGTTCTGCATCTGGT      |
| PA3479    | <i>rhIA</i>  | rhIA-F      | AACATTTCAACGTGGTGCTG      |
|           |              | rhIA-R      | ATTTCCACCTCGTCGTCCTT      |
| PA3621.1  | <i>rsmZ</i>  | rsmZ-F      | CGTACAGGGAACACGCAAC       |
|           |              | rsmZ-R      | TTCAGTCCCTCGTCATCATC      |
| PA3622    | <i>rpoS</i>  | rpoS-F      | CACTTCCTTCTCTTCCAAACAACAC |
|           |              | rpoS-R      | AGCTGCGTTGCGTCCAA         |
| PA3724    | <i>lasB</i>  | lasB-F      | AACCGTGCGTTCTACCTGTT      |
|           |              | lasB-R      | TGGTGGCGGTCCAGTAGTA       |

|               |              |         |                          |
|---------------|--------------|---------|--------------------------|
| <b>PA4210</b> | <i>phzA1</i> | phzA1-F | AACCACTACATCCATTCCCTTCG  |
|               |              | phzA1-R | CGGCTATTCCAATGCAC        |
| <b>PA4525</b> | <i>pilA</i>  | pilA-F  | ACCCGCTGAAGACCACTGTT     |
|               |              | pilA-R  | CGGTCGCAGTAGAAGCAGTAGTAC |
| <b>PA5272</b> | <i>cyaA</i>  | cyaA-F  | CGCTCAAGGAGCAGGTATT      |
|               |              | cyaA-R  | GAGATGGCGATAGACCAGGA     |
| <b>PA5338</b> | <i>spoT</i>  | spoT-F  | CTCCGAGTCGATCAACCTCG     |
|               |              | spoT-R  | TGCGTTCCTGGGGAATCTTC     |

## SUPPLEMENTARY REFERENCES

Hancock RE, Carey AM. 1979. Outer membrane of *Pseudomonas aeruginosa*: heat- 2-mercaptoethanol-modifiable proteins. J Bacteriol 140:902-10.

Fletcher MP, Diggle SP, Camara M, Williams P. 2007. Biosensor-based assays for PQS, HHQ and related 2-alkyl-4-quinolone quorum sensing signal molecules. Nat Protoc 2:1254-62.

Winson MK, Swift S, Fish L, Throup JP, Jørgensen F, Chhabra SR, Bycroft BW, Williams P, Stewart GS. 1998. Construction and analysis of *luxCDABE*-based plasmid sensors for investigating *N*-acyl homoserine lactone-mediated quorum sensing. FEMS Microbiol Lett 163: 185–192.
